# Supplementary material for: Association of Multiple Rib Fractures With Pneumonia After Successful Cardiopulmonary Resuscitation: A Retrospective Cohort Study Using Propensity Score Matching
Source: Research Square preprint supplement (doi:10.21203/rs.3.rs-104372/v1), 2020-11-13
Supplement: Supplementary file 1 [file 342c78453f4a59d8fb31166e.xlsx]

## Sheet: Sheet1
	Table 1 Characteristics of the study population before and after propensity score-matching
					Before propensity score-matching					After propensity score-matching
	Characteristic		Total		Multiple rib fracture group	Non-multiple rib fracture group		Std diff		Multiple rib fracture group	Non-multiple rib fracture group		Std diff
			(n = 87)		(n = 32)	(n = 55)				(n = 25)	(n = 25)
	Age >74 years, n (%) *		23 (26)		11 (34)	12 (22)		0.282135		7 (28)	7 (28)		0
	Male sex, n (%)*		55 (63)		18 (56)	37 (67)		0.36		16 (64)	16 (64)		0
	Witnessed arrest, n (%)		65 (75)		25 (78)	40 (73)		0.125623		19 (76)	16 (64)		0.264135
	Bystander CPR, n (%)		47 (54)		18 (56)	29 (53)		0.0707845		14 (56)	13 (52)		0.0803219
	Initial shockable rhythm (VF/VT), n (%)		31 (36)		10 (31)	21 (38)		0.145993		7 (28)	9 (36)		0.172133
	Duration of CPR >33 min, n (%)*		34 (39)		18 (56)	16 (29)		0.571059		11 (44)	11 (44)		0
	Rib fracture, n (%)		42 (48)		32 (100)	10 (18)		3		25 (100)	6 (24)		2.51661
	Flail chest, n (%)		23 (26)		23 (72)	0 ( 0.0)		2.26078		17 (68)	0 ( 0.0)		2.06155
	Mechanical ventilation, n (%)*		79 (91)		32 (100)	47 (86)		0.58346		25 (100)	25 (100)		N.S.
	Therapeutic hypothermia, n (%)*		43 (49)		21 (66)	22 (40)		0.531103		16 (64)	16 (64)		0
	Muscle relaxants, n (%)*		28 (32)		15 (47)	13 (24)		0.501458		10 (40)	9 (36)		0.0824786
	Prophylactic antibiotics, n (%)*		45 (52)		17 (53)	28 (51)		0.0443652		13 (52)	12 (48)		0.0800641
	Pneumonia, n (%)		35 (40)		23 (72)	12 (22)		1.15953		18 (72)	10 (40)		0.681005
	Mortality within 7 days, n (%)		19 (22)		7 (22)	12 (22)		0.00137506		5 (20)	4 (16)		0.104257
	* Factors adjusted for by propensity score. Abbreviations: CPR, cardiopulmonary resuscitation; N.S., not significant; Std diff, standardized difference
